# Supplementary material
Source: PubMed Central journal article supplement (PMC5181115)

# Supp. Fig. 5

## A Approach for pooled cloning and virus preparation

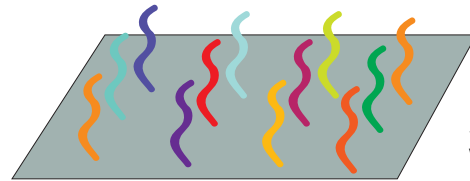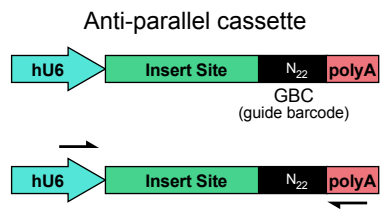

Insert library of guides into diverse barcoded backbones

NGS sequencing to pair sgRNA with GBC

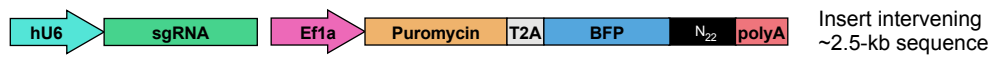

## B

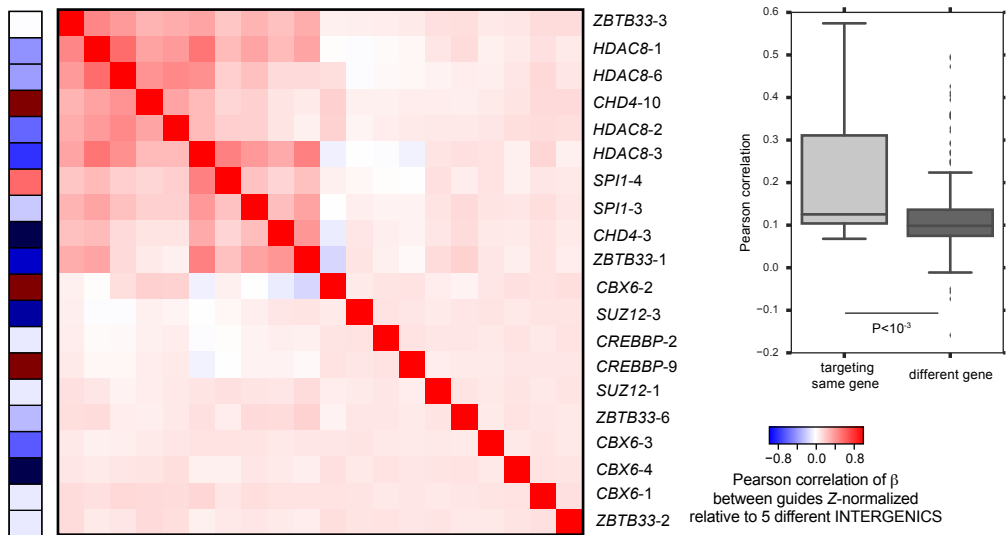

Supplement: NIHMS835459-supplement-5.pdf [file NIHMS835459-supplement-5.pdf]
