# Supplementary material
Source: PubMed Central journal article supplement (PMC5181115)

# Supp. Fig. 1

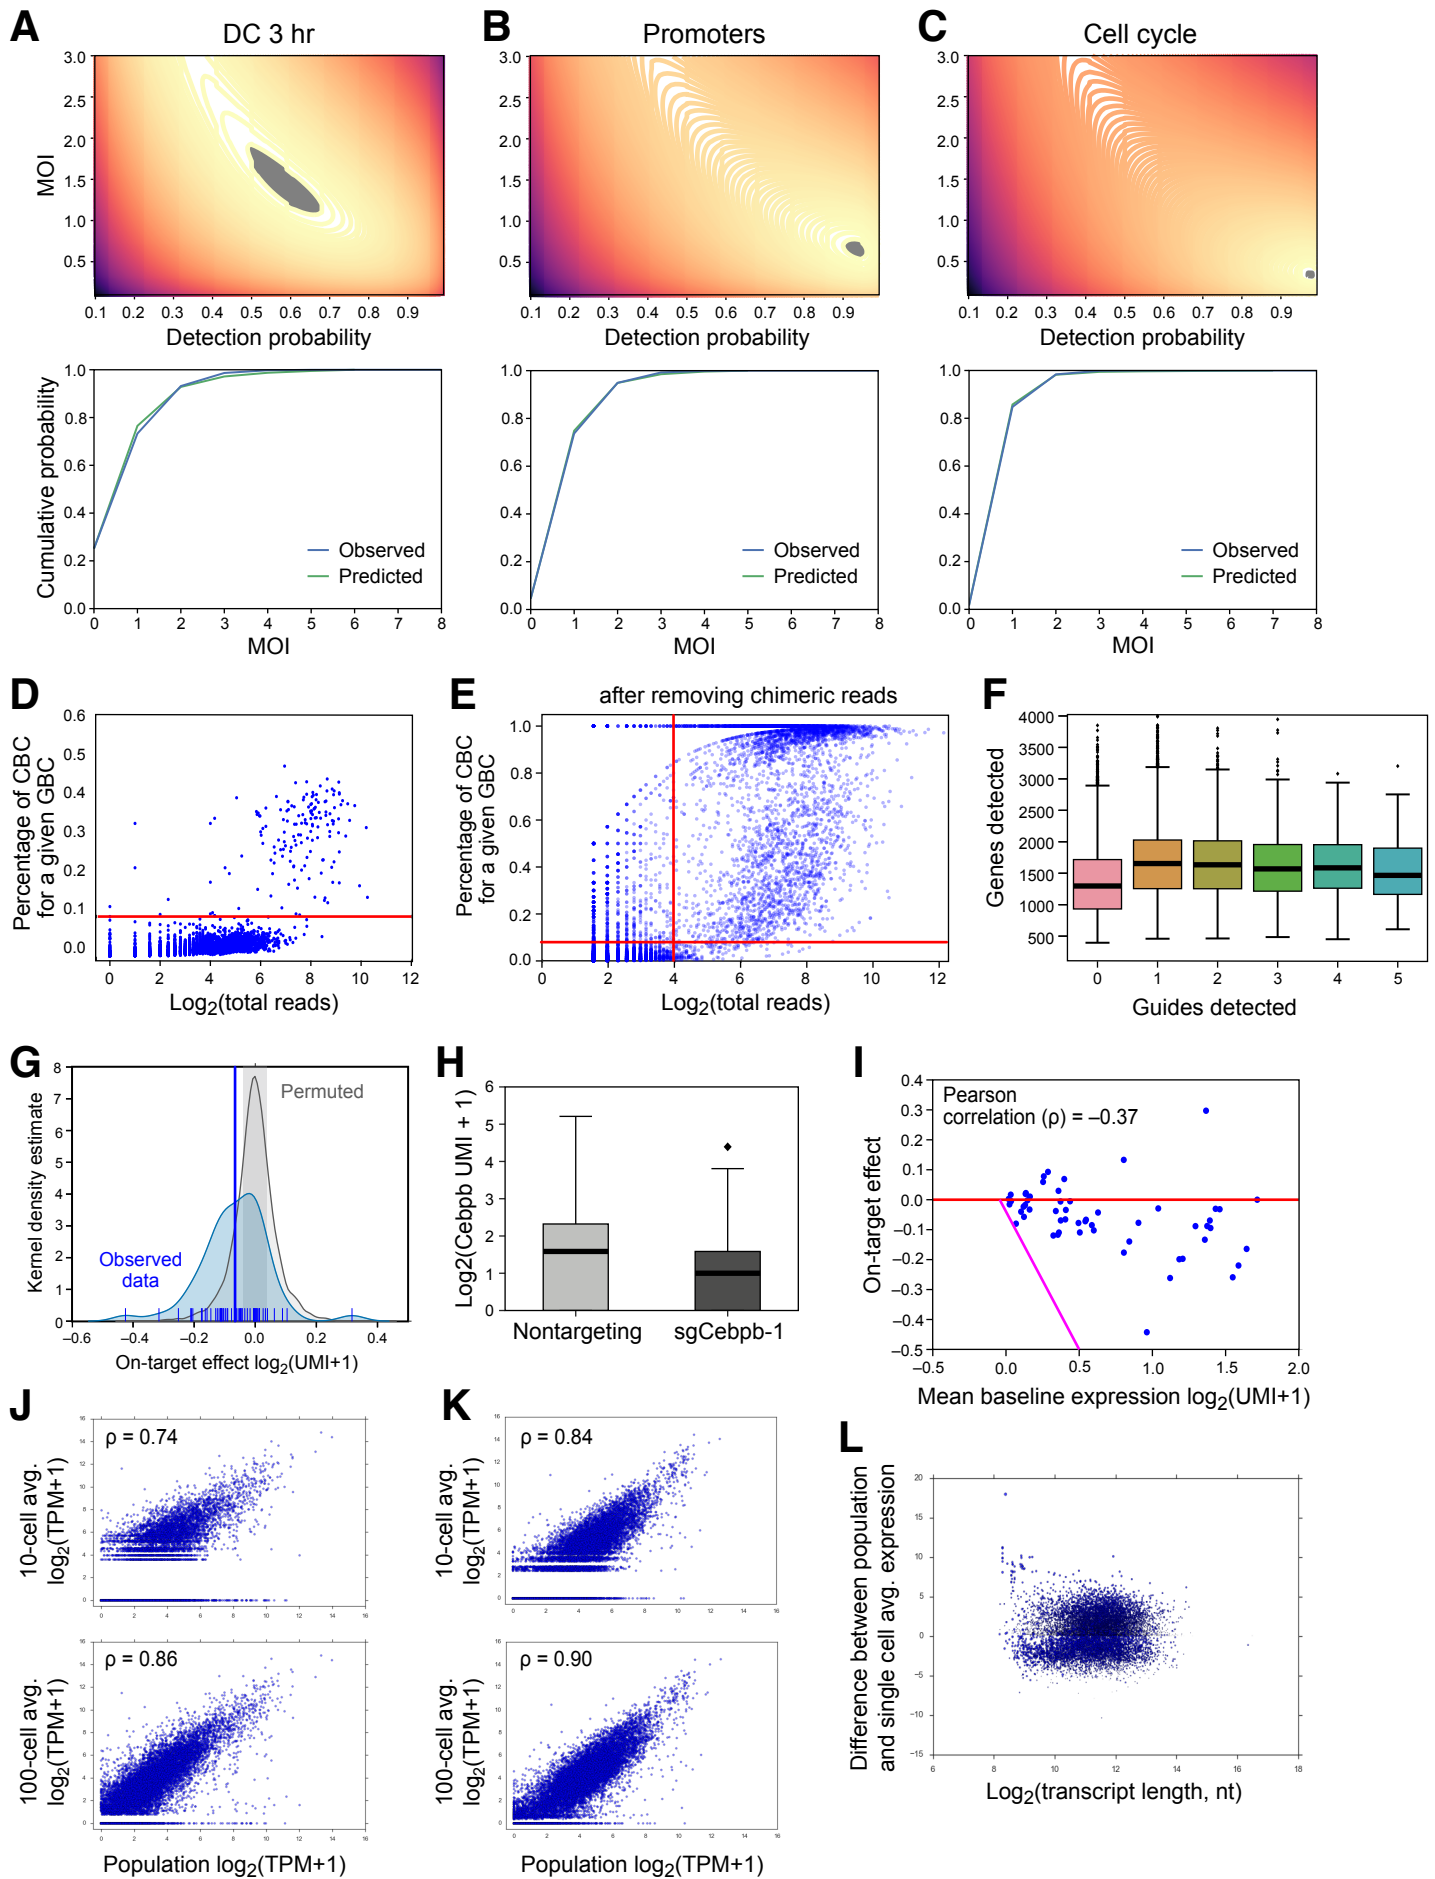

Supplement: NIHMS835459-supplement-1.pdf [file NIHMS835459-supplement-1.pdf]

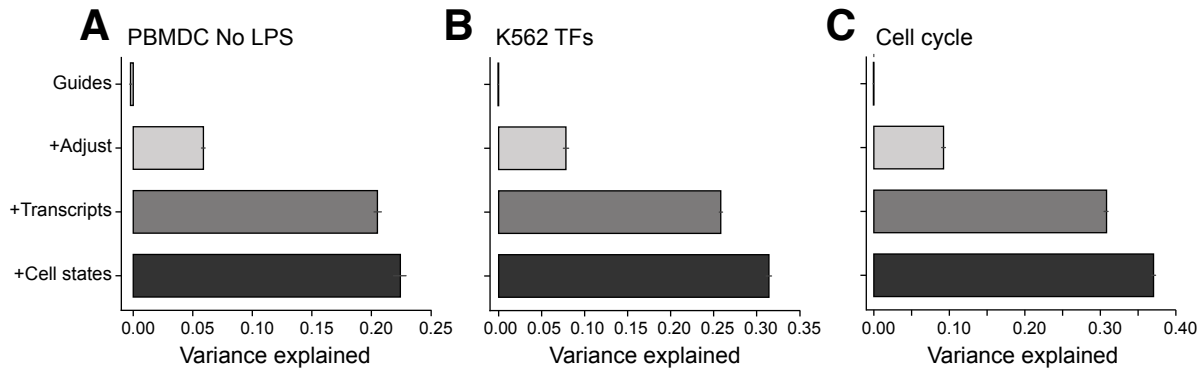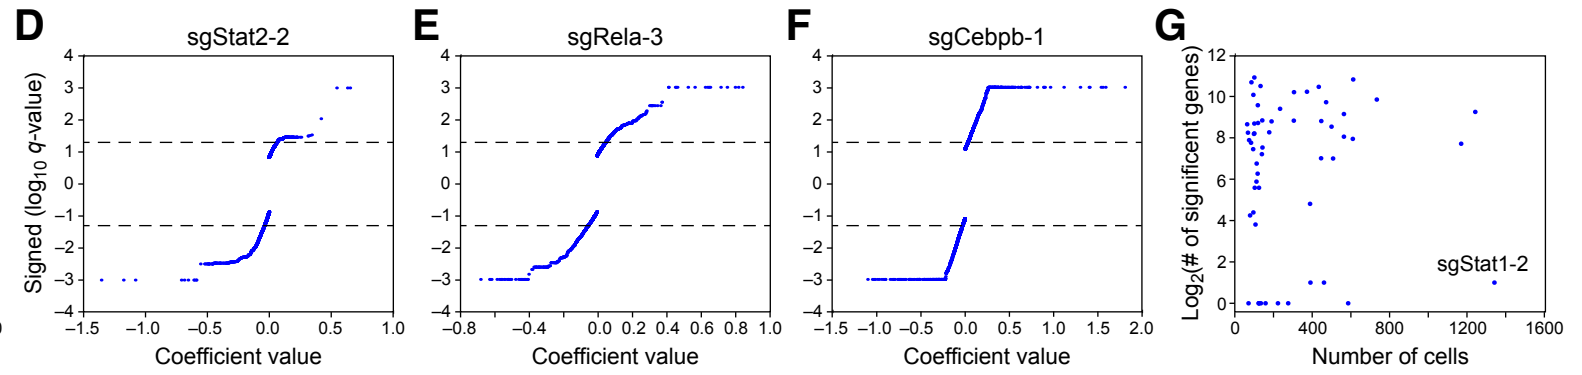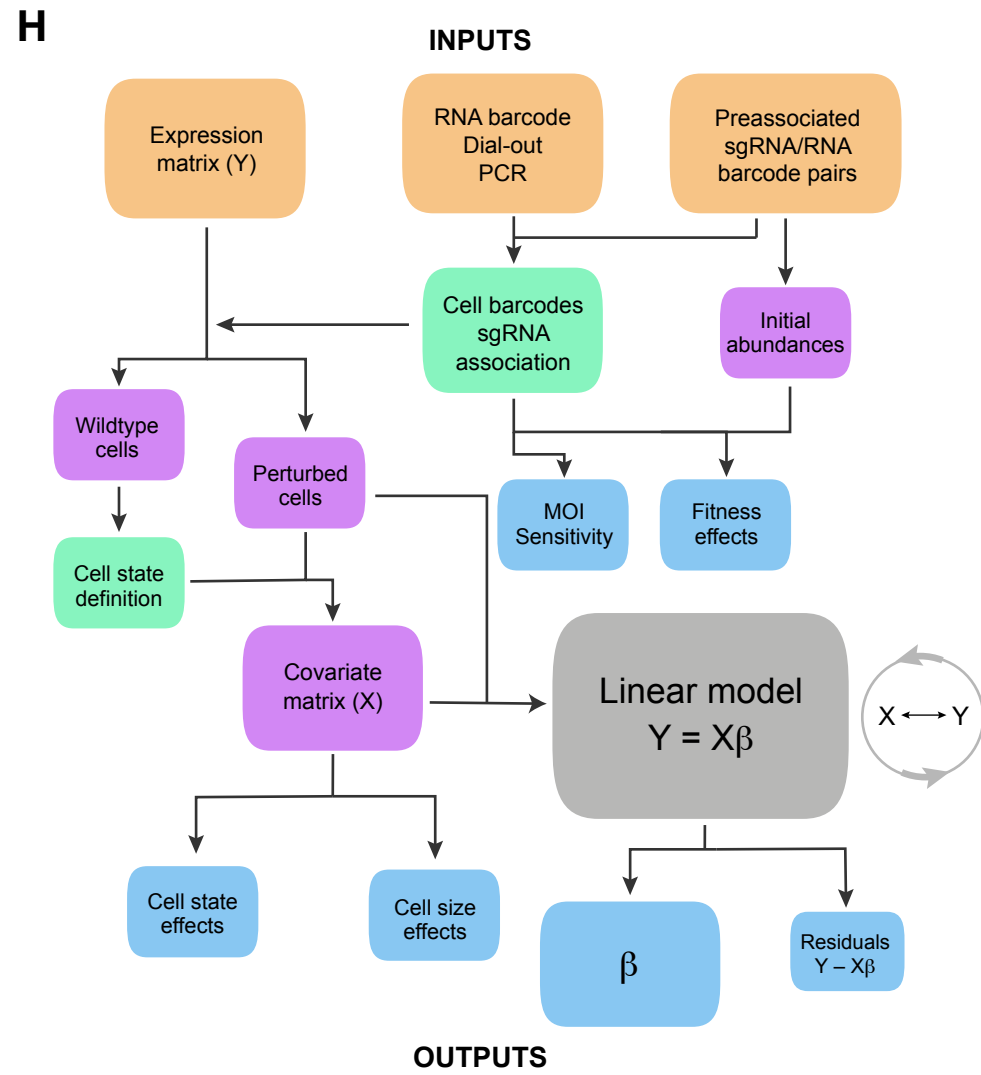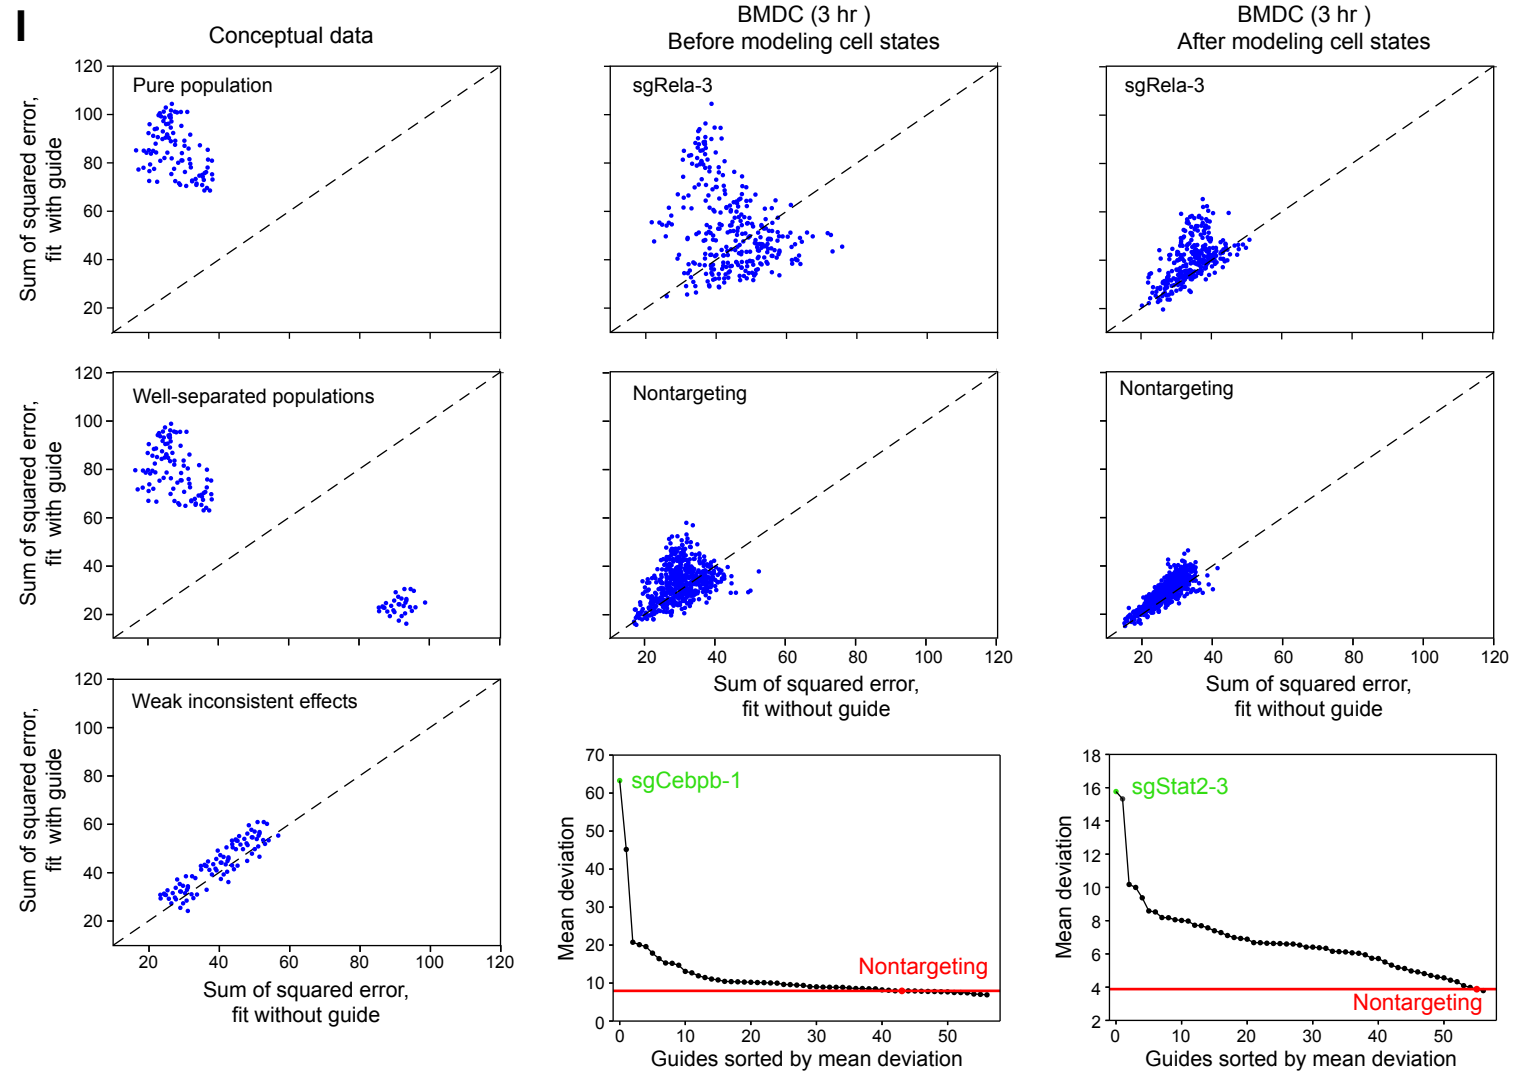

Supplement: NIHMS835459-supplement-2.pdf [file NIHMS835459-supplement-2.pdf]

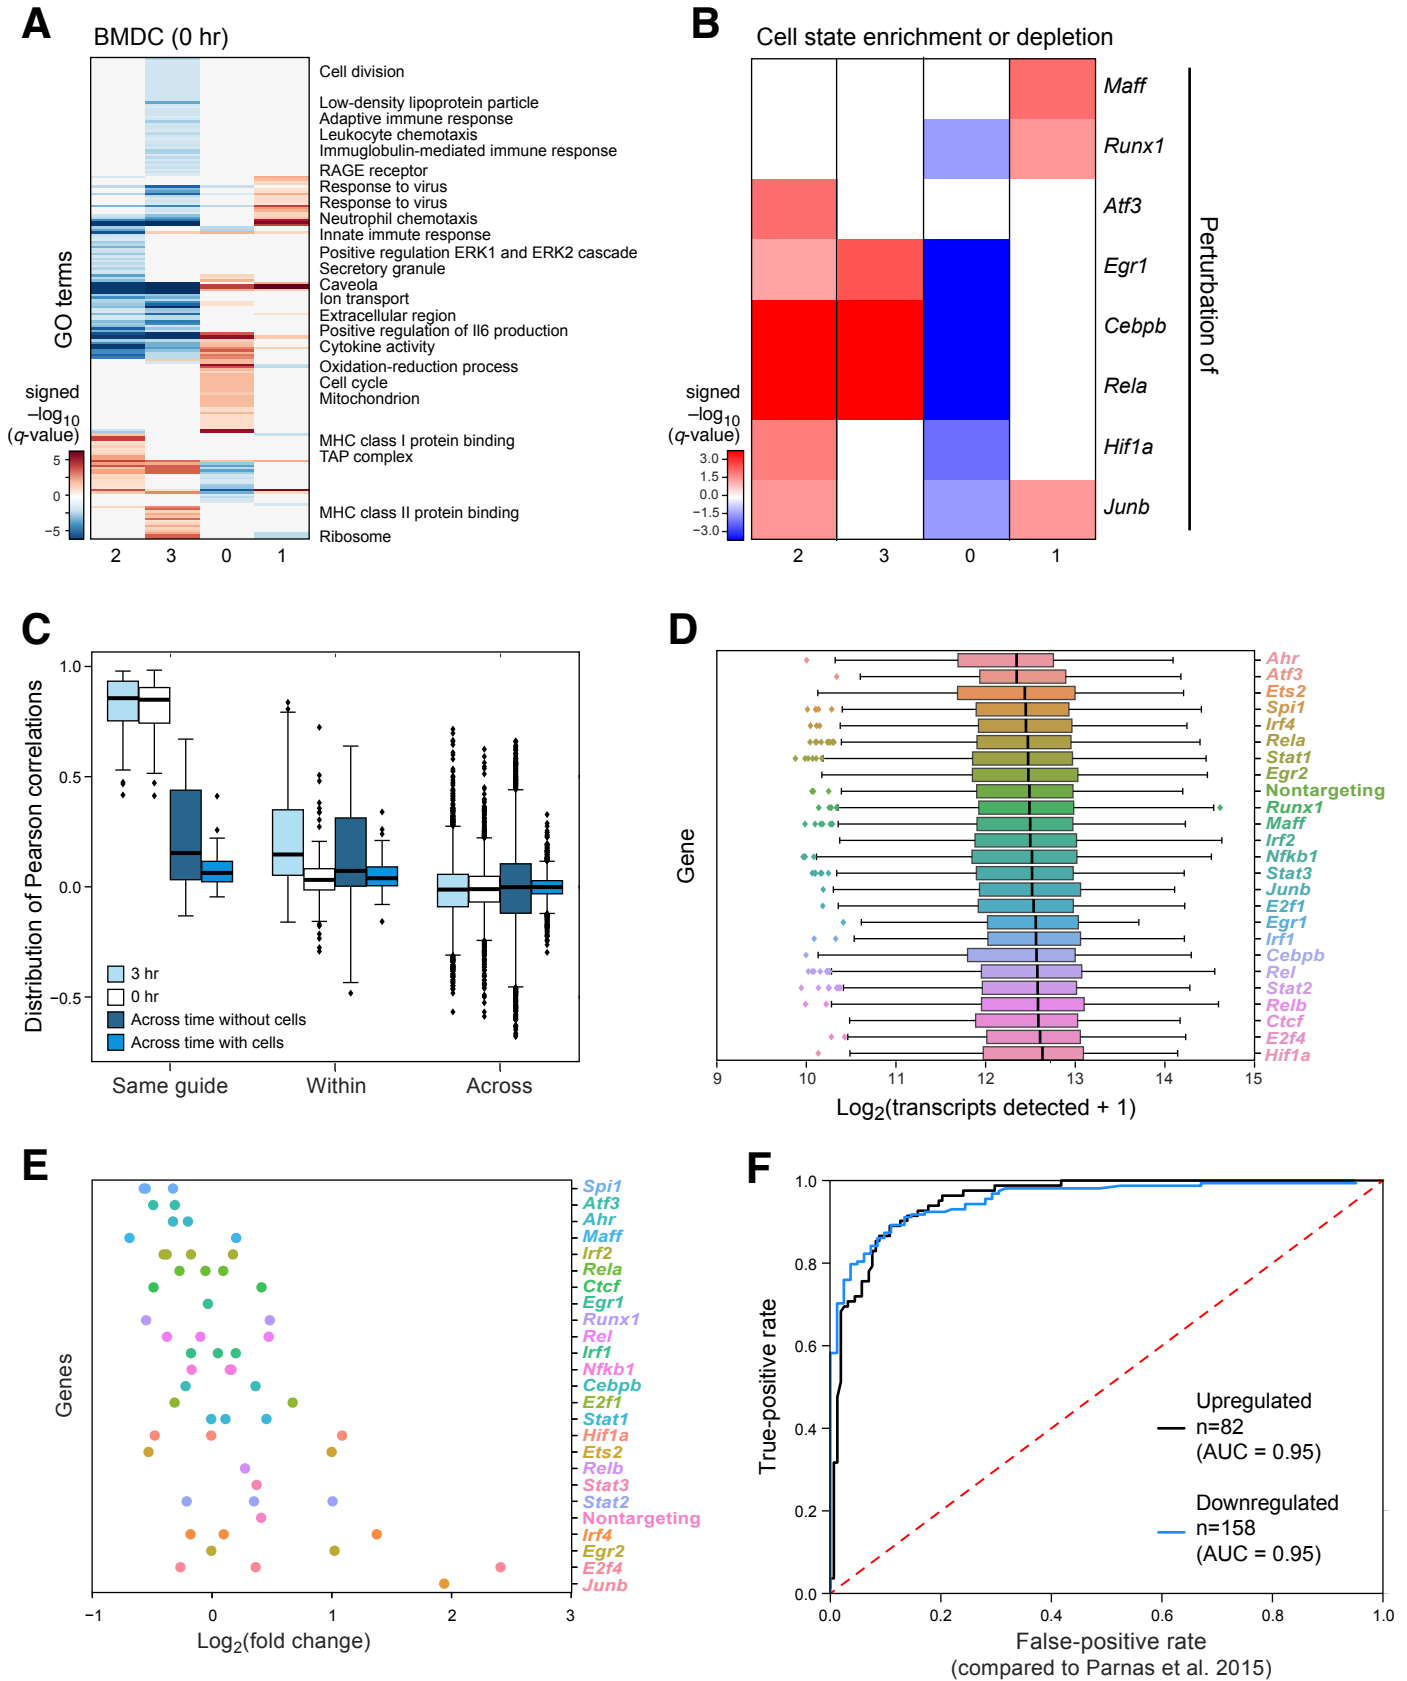

Supplement: NIHMS835459-supplement-3.pdf [file NIHMS835459-supplement-3.pdf]

**A**

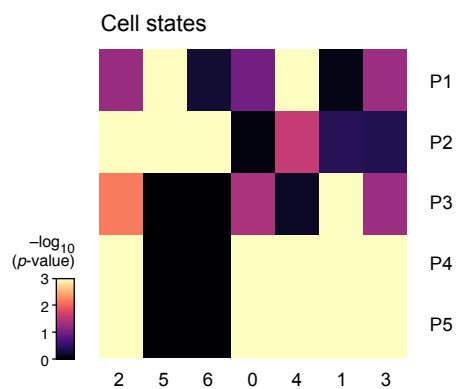

**B**

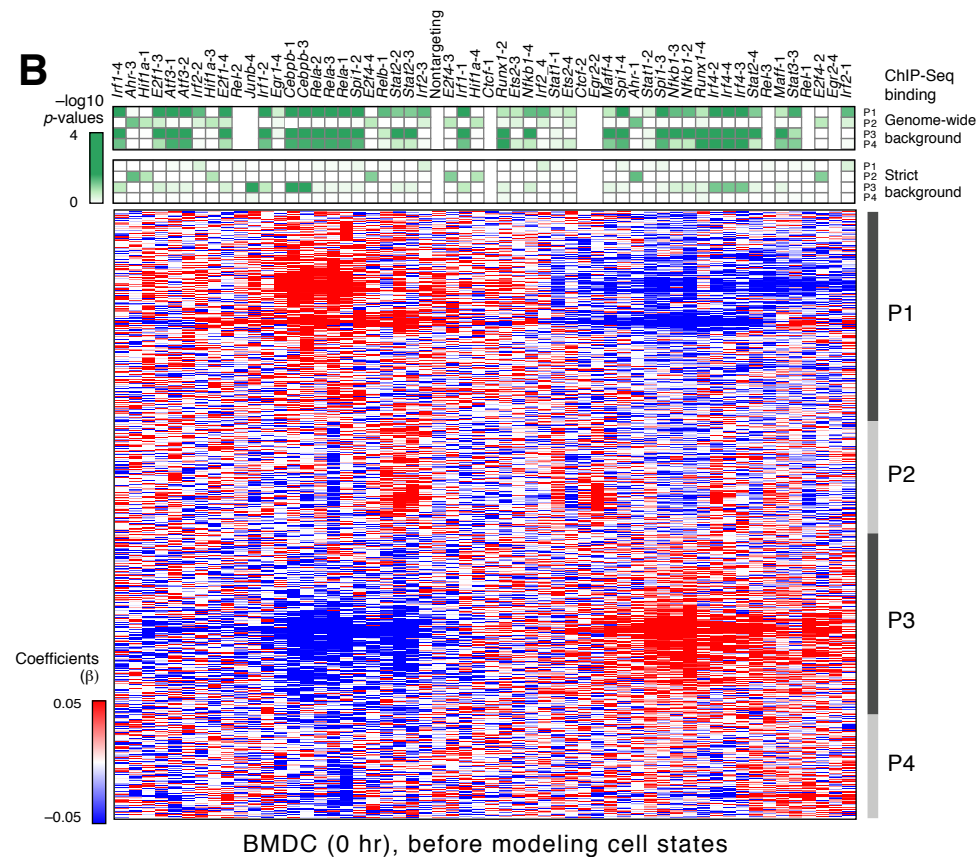

**C**

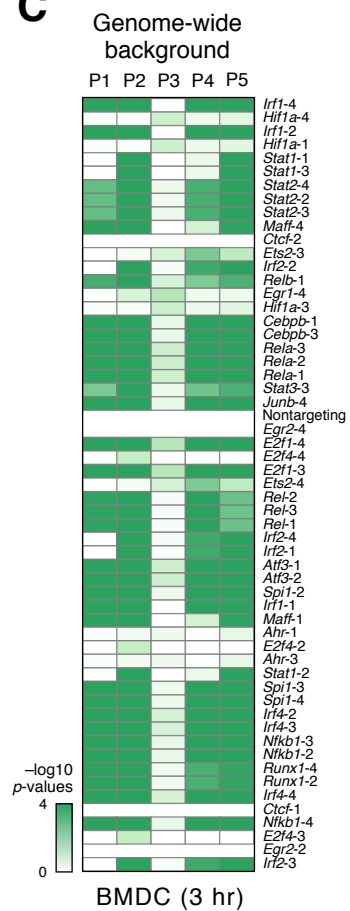

**D**

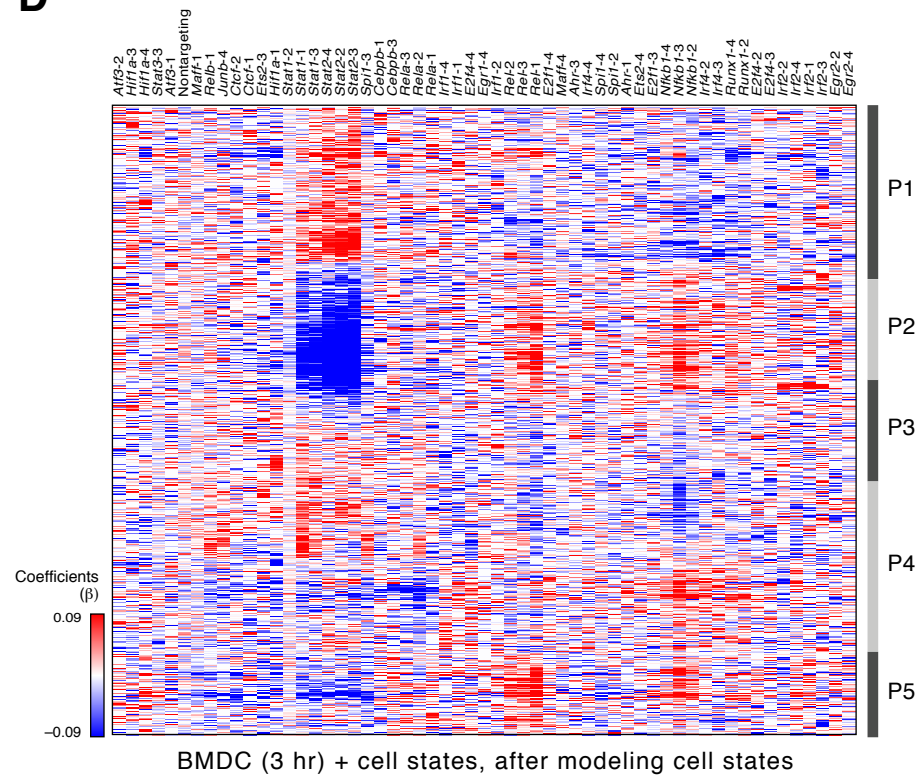

Supplement: NIHMS835459-supplement-4.pdf [file NIHMS835459-supplement-4.pdf]

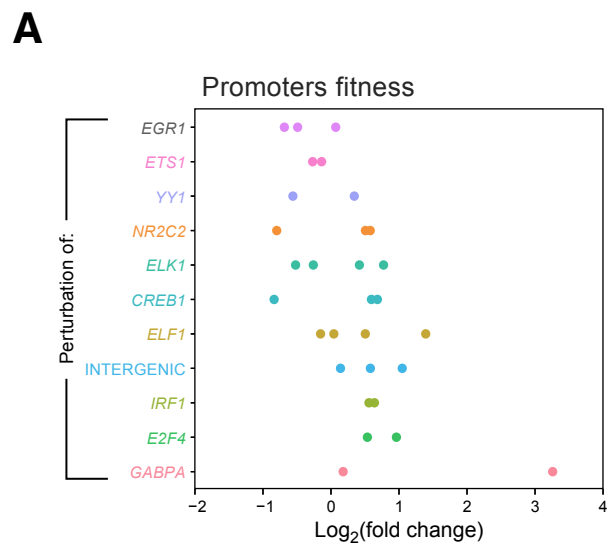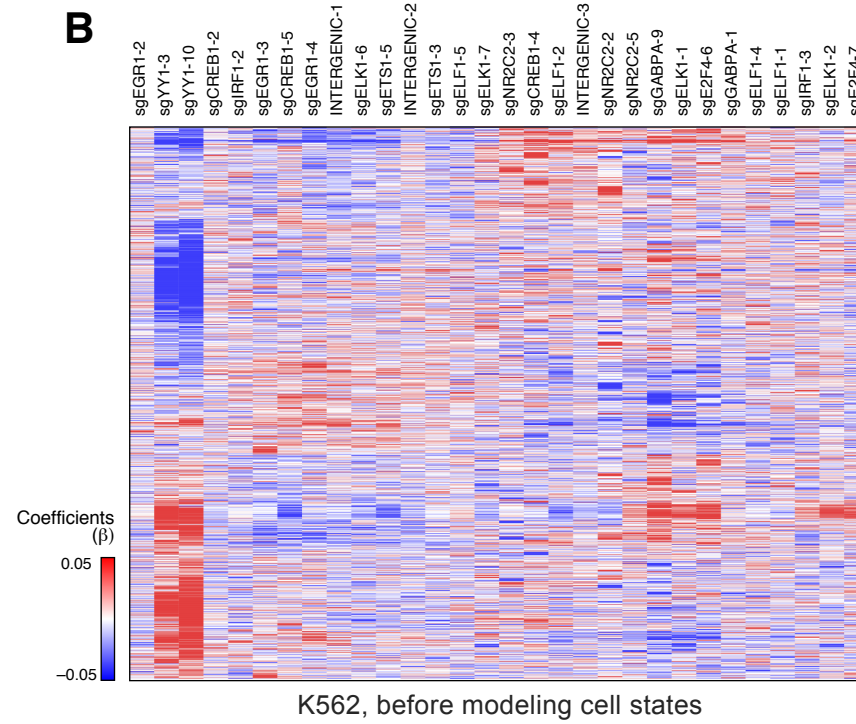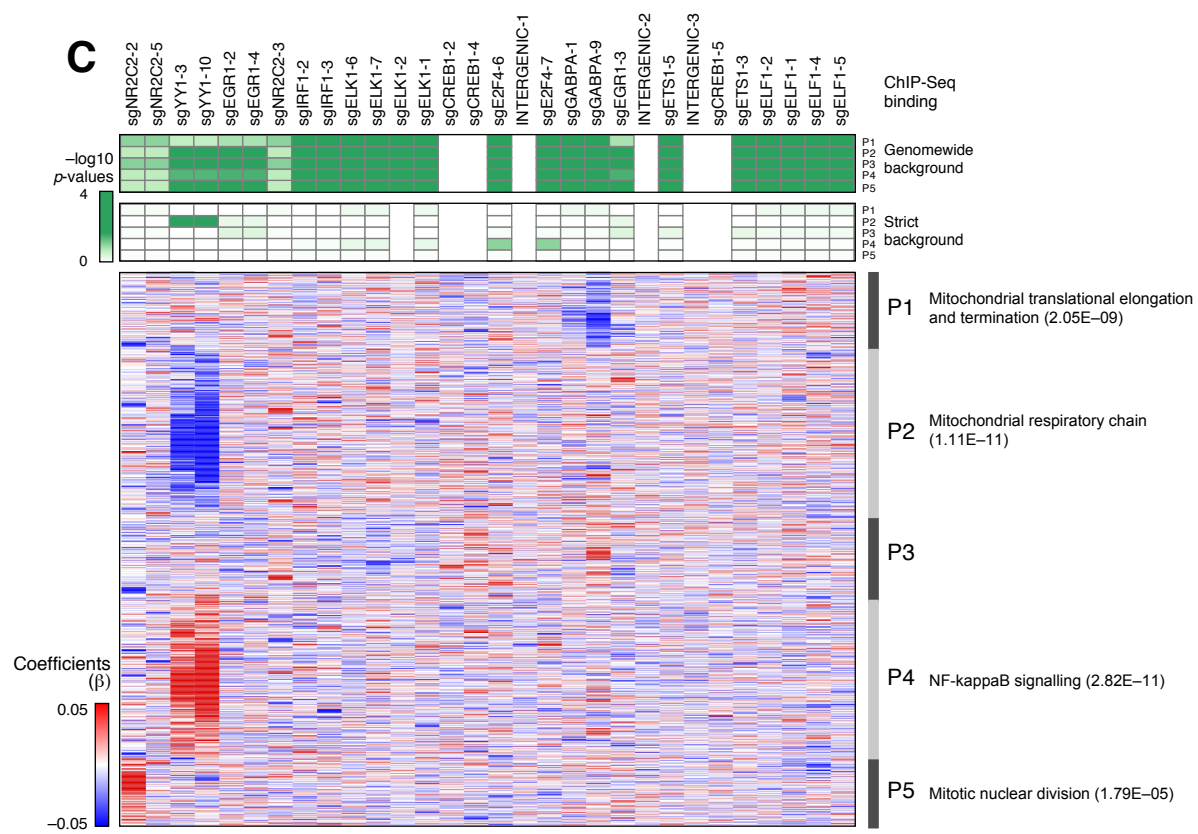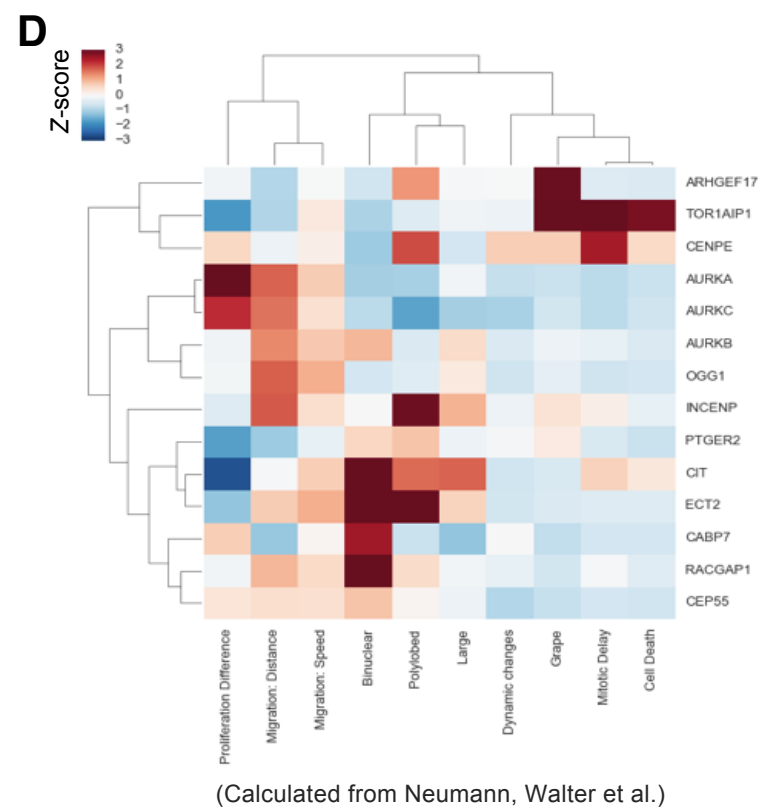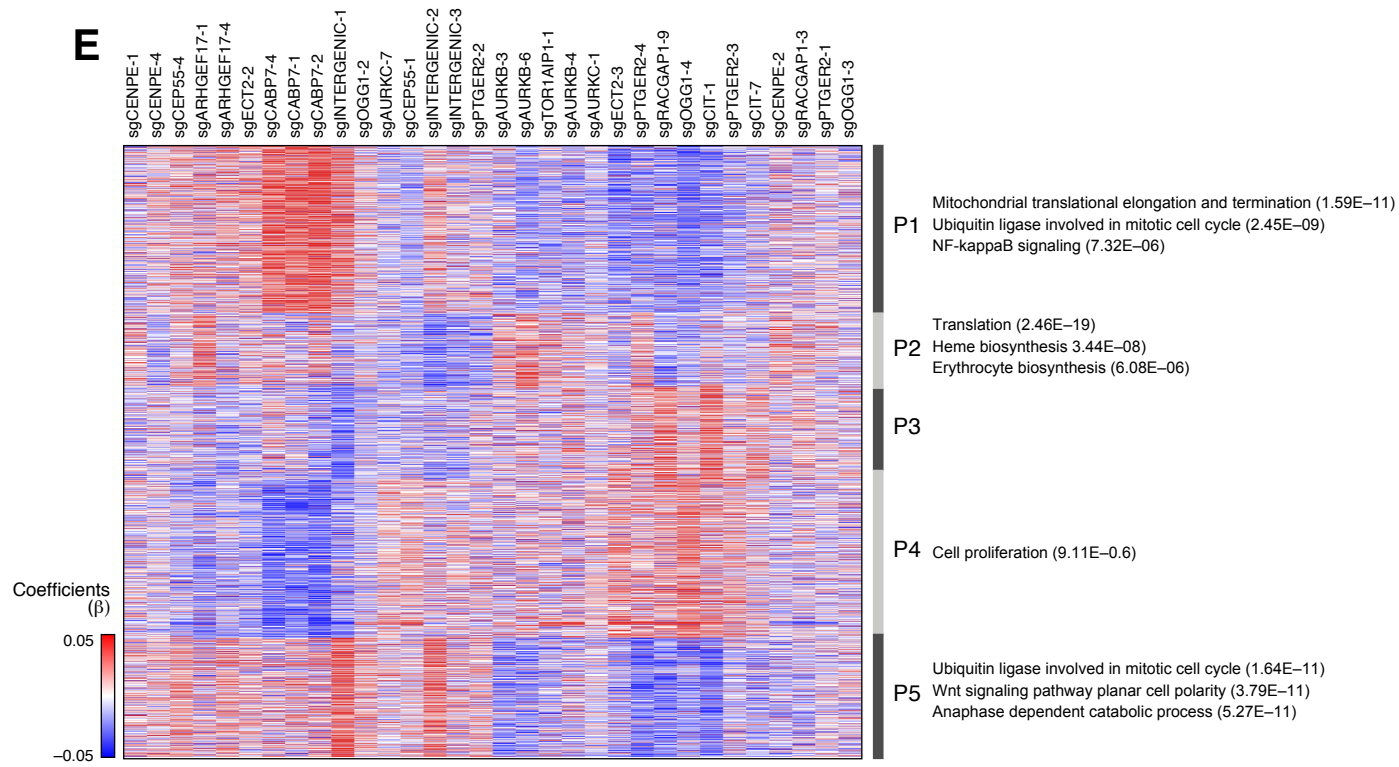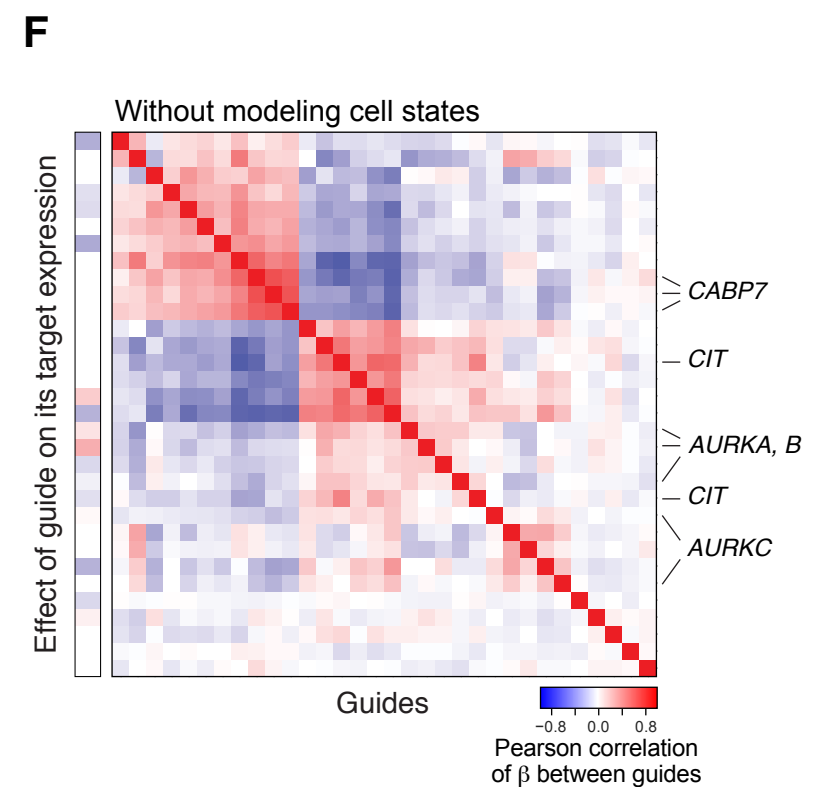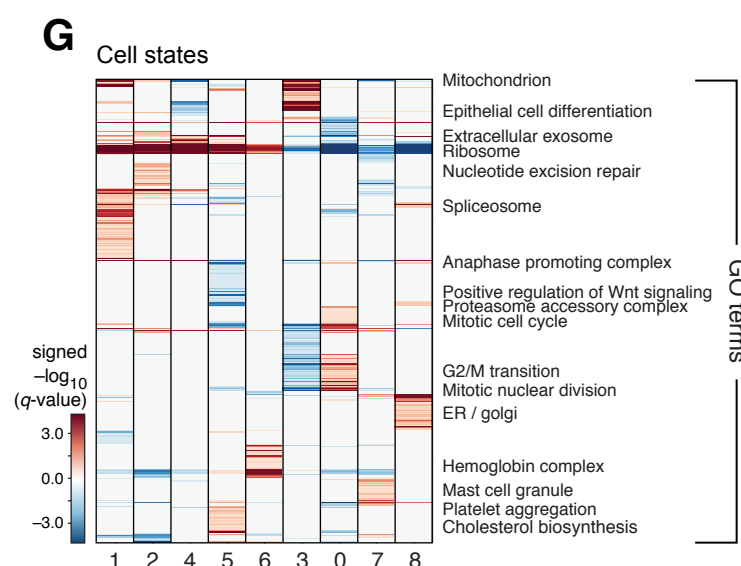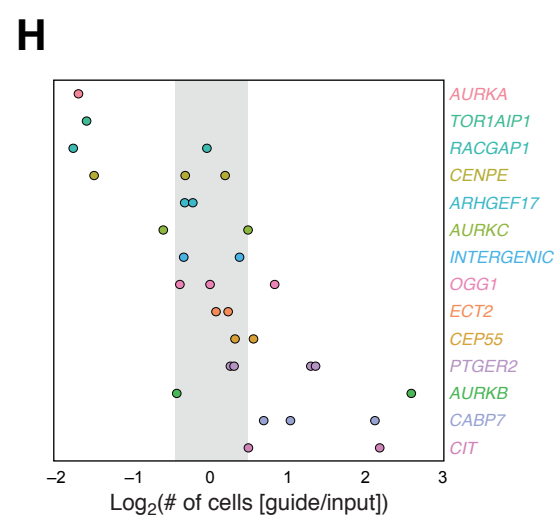

Supplement: NIHMS835459-supplement-6.pdf [file NIHMS835459-supplement-6.pdf]

Figure S7

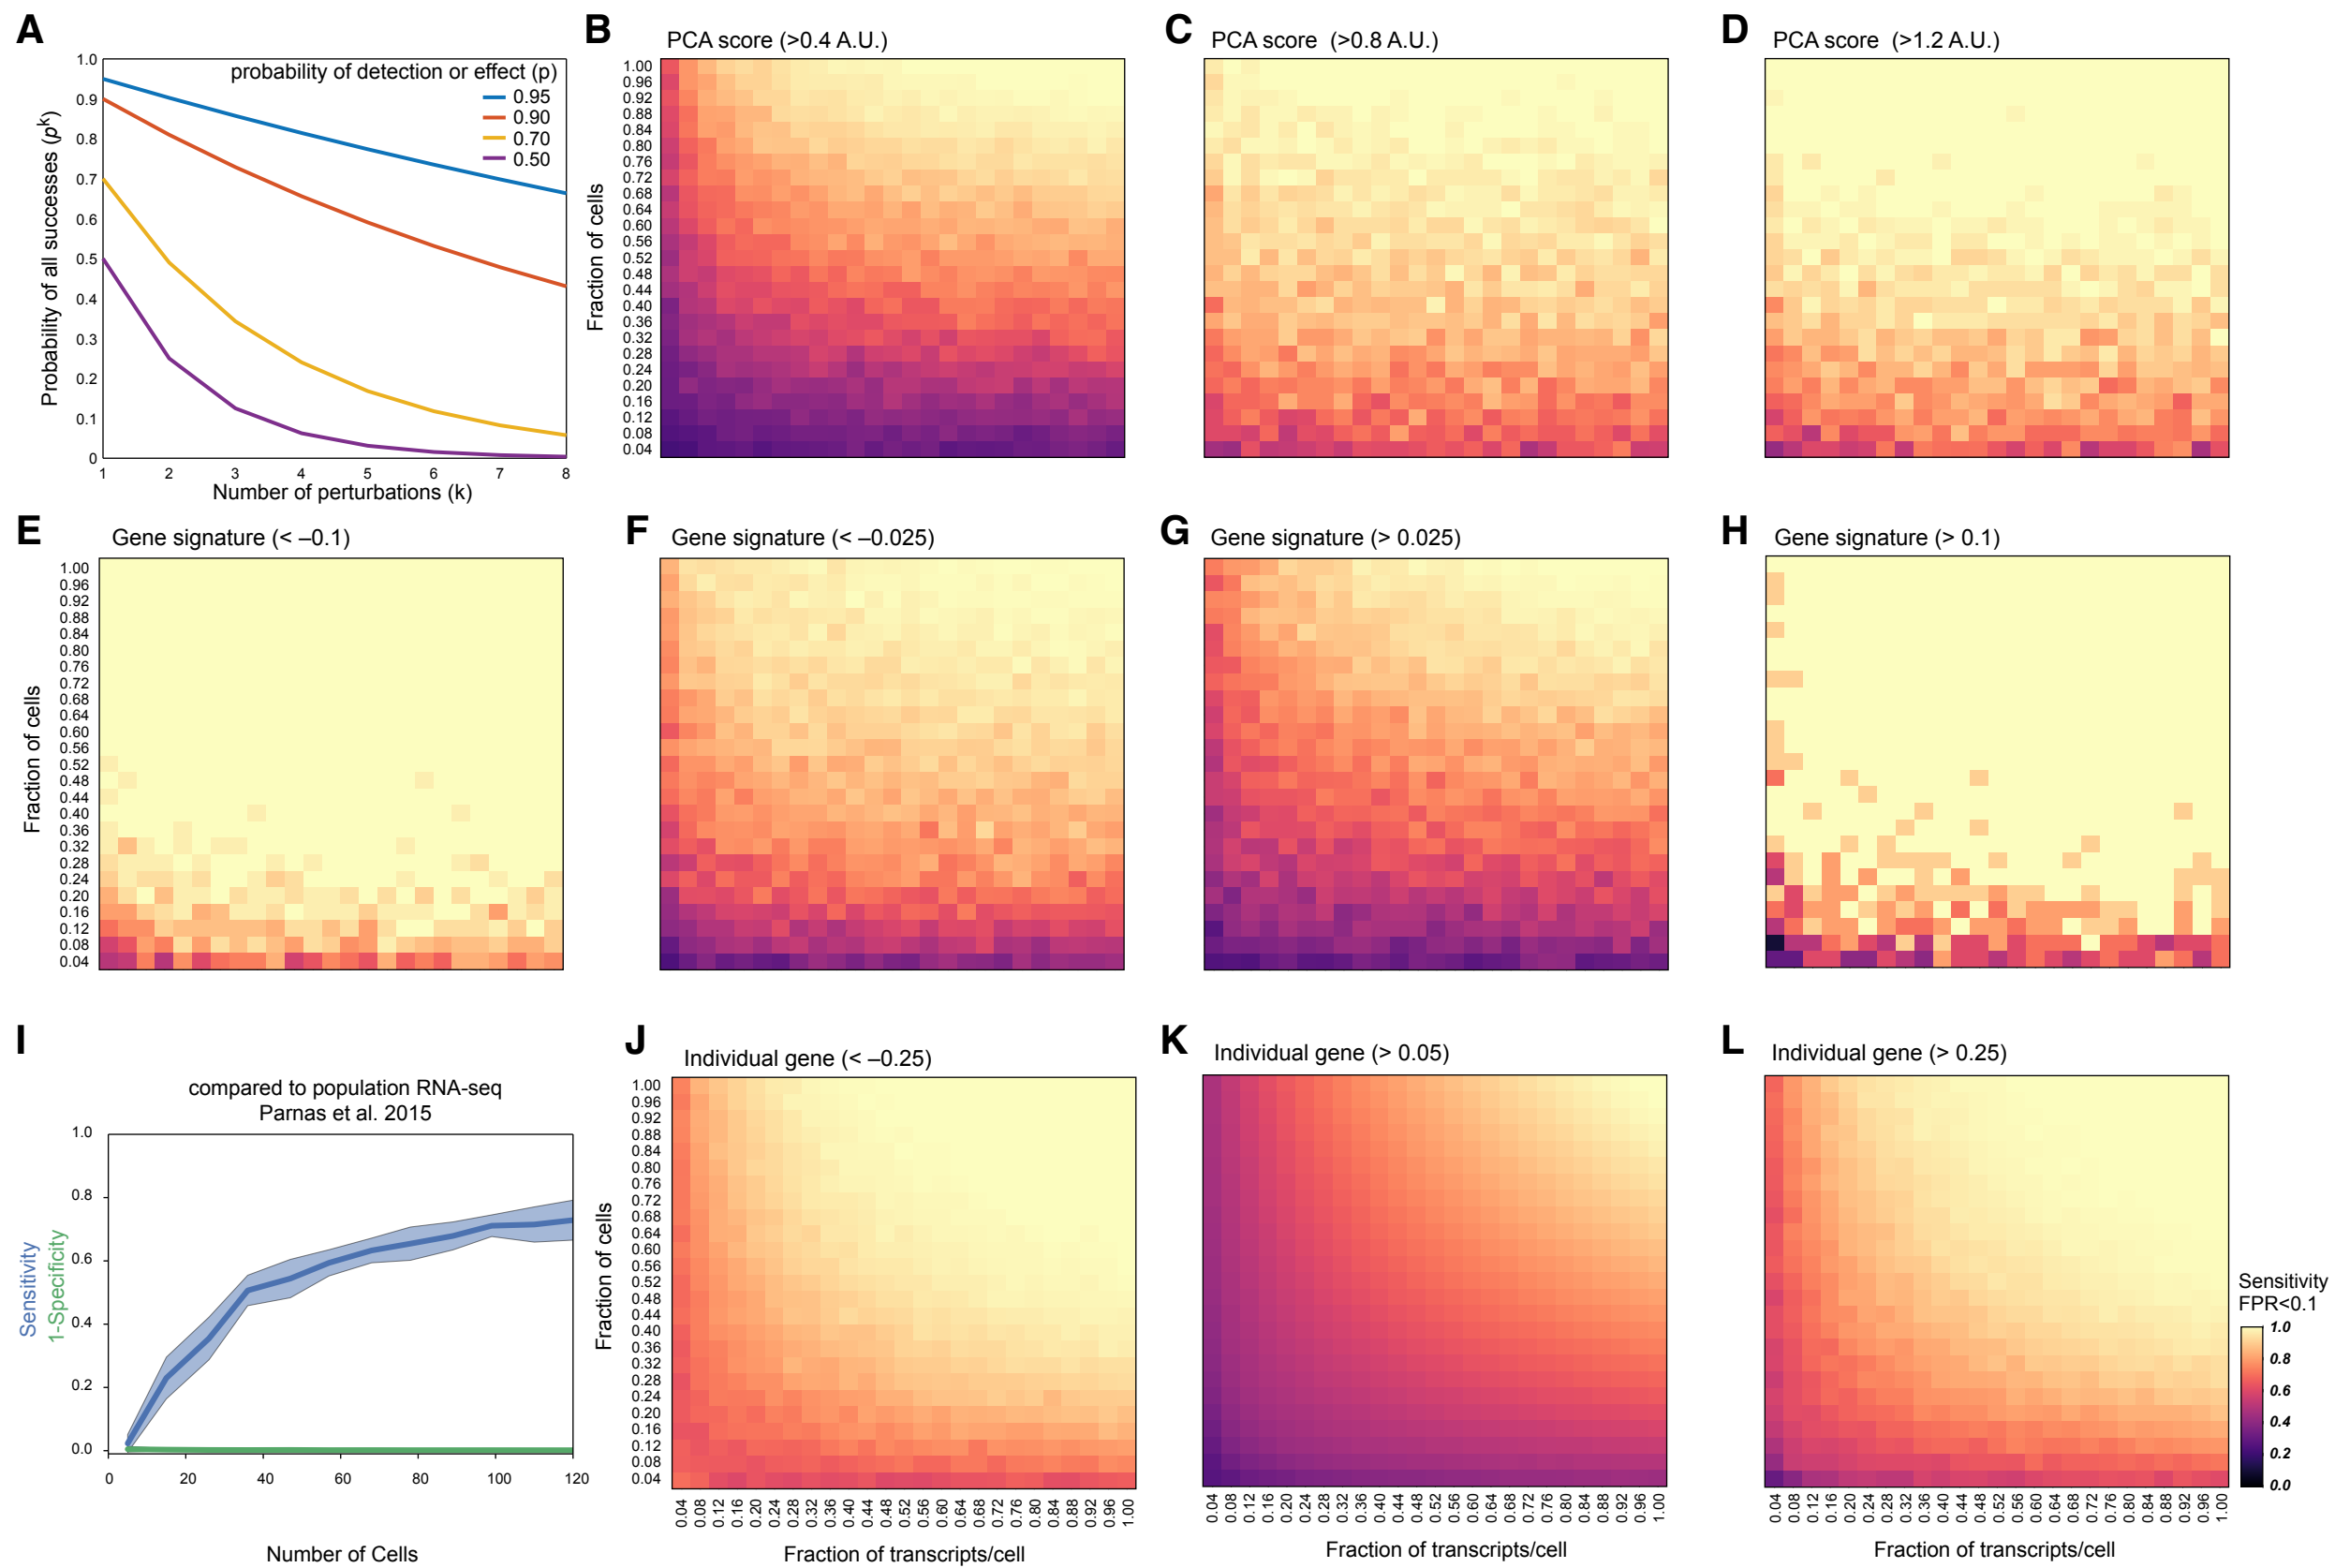

Supplement: NIHMS835459-supplement-7.pdf [file NIHMS835459-supplement-7.pdf]
